# Supplementary material
Source: PubMed Central journal article supplement (PMC7042796)
Supplement: jamaoncol-6-528-s003.pdf [file jamaoncol-6-528-s003.pdf]

## Data Sharing Statement

Steenbruggen. High-Dose Chemotherapy With Hematopoietic Stem Cell Transplant in Patients With High-Risk Breast Cancer and 4 or More Involved Axillary Lymph Nodes. *JAMA Oncol*. Published January 30, 2020. 10.1001/jamaoncol.2019.6276

### Data

**Data available:** Yes

**Data types:** Deidentified participant data

**How to access data:** Data may be requested via the corresponding author.

**When available:** With publication

### Supporting Documents

**Document types:** None

### Additional Information

**Who can access the data:** anyone requesting the data

**Types of analyses:** analyses considered relevant by the authors

**Mechanisms of data availability:** after approval of a proposal and with a signed data access agreement
